---

Loss of type I procollagen gene expression in SV40-transformed human fibroblasts is accompanied by hypermethylation of these genes

---

M.Iqbal Parker\*, Karen Judge and Wieland Gevers

---

Department of Medical Biochemistry, University of Cape Town Medical School, Observatory 7925, Republic of South Africa

---

Received 16 July 1982; Revised and Accepted 10 September 1982

---

ABSTRACT

Transformation of human lung fibroblasts (WI-38) by Simian Virus 40 (SV40) resulted in a decline of 25-30% in the amount of secreted collagen. The collagen produced by the transformed fibroblasts contained no type I collagen (i.e.  $\alpha 1(I)$  and  $\alpha 2$  chains), which was the major collagen component produced by untransformed fibroblasts. Measurement of the procollagen mRNA levels by dot hybridization with nick-translated procollagen-cDNA clones showed that the absence of type I collagen was due to the absence of  $\alpha 1(I)$  and  $\alpha 2$  procollagen mRNAs. This result was confirmed by hybridization of cDNA to total RNA with southern blots of the procollagen clones. To clarify the mechanism by which type I procollagen gene transcription is abolished in transformed cells, the methylation patterns of the  $\alpha 1(I)$  and  $\alpha 2$  procollagen genes in normal and SV40-transformed fibroblasts were compared, using the chicken  $\alpha 1(I)$  and  $\alpha 2$  procollagen-cDNA clones as probes. Methylated sites were detected by means of the restriction endonuclease isoschizomers HpaII and MspI. Methylation of the procollagen  $\alpha 1(I)$  and  $\alpha 2$  genes was increased in the SV40-transformed fibroblasts, concurrently with the loss of type I collagen synthesis. DNA methylation may thus contribute to altered regulation of gene expression upon cell transformation.

INTRODUCTION

Neoplastic transformation of normal fibroblasts results in significant changes in the synthesis of various macromolecules. Some of these alterations affect the formation of extracellular matrix components. Thus increased levels of hyaluronic acid (1,2) and decreased levels of proteoglycans (3,4,5), fibronectin (5) and collagen have been observed. Collagen is perhaps the most extensively studied matrix component in both virally (7-21) and chemically (10,19,22) transformed fibroblasts. Transformation is accompanied by loss of anchorage dependence and density-dependent inhibition of growth; this suggests that decreased synthesis of some extracellular matrix components is functionally related to neoplastic transformation. Thus Sandmeyer et al (19) found that the severity of transformation in a series of cells was directly proportional to the degree by which collagen synthesis was decreased. Altered gene expression following on transformation furnishes a

system to study the regulation of affected genes and also the mechanism by which specificity in this process is achieved. Our previous studies (15) as well as those of others (16,17) have shown that decreased collagen gene expression is generally due to decreased collagen gene transcription.

The collagens represent a family of at least nine genetically distinct alpha chains, with normal fibroblasts producing 75-90% type I collagen (23-25). In order to study the abolition of type I procollagen gene expression in SV40-transformed cells, we used pro  $\alpha 1(I)$  and pro  $\alpha 2$  cDNA clones. Possible explanations for the abolition of type I procollagen gene expression could include (i) deletion of regulatory or coding sequences as in the case of the thalassaemias, (ii) production of an inhibitor specific for type I procollagen gene transcription, or (iii) modification of the type I procollagen genes, resulting in their inactivation. It is also possible that an inhibitor could recognise modified DNAs. Several studies have implicated DNA methylation in the regulation of gene expression. Amongst the systems studied are the globin genes (26-31), the ovalbumin and conalbumin genes (32,33) and the genes for immunoglobulins (34-36), metallothionein-1 (37) and delta-crystallins (38). These studies have shown hypermethylation of specific genes in tissues in which the gene products are not made. Approximately 90% of the 5-methylcytosine in eukaryotic DNA occurs in the dinucleotide CpG (39) and these sites can be detected by combinations of restriction endonucleases which are respectively sensitive and insensitive to methylated sites in their recognition sequences (40,41).

Our studies show that SV40-transformed WI-38 human lung fibroblasts totally shut off their production of type I collagen with the continued synthesis of a minor collagen component. This "switch" in collagen gene expression is accompanied by hypermethylation of the type I procollagen genes in the transformed fibroblasts.

### MATERIALS AND METHODS

WI-38 human lung fibroblasts and SV40-transformed counterparts were gifts from Drs Gary and Janet Stein (University of Florida, USA), the  $\alpha 1(I)$  (pCg 54) and  $\alpha 2$  (pCg 45) procollagen cDNA clones were gifts from Dr Helga Boedtker (Harvard Medical School, USA), and avian myeloblastosis virus reverse transcriptase was supplied by Dr J.W. Beard (Life Sciences Inc., Florida, USA). Restriction enzymes were obtained from Boehringer Mannheim or from Bethesda Research Laboratories, Maryland, USA. All chemicals were analytical (Merck or BDH) and solutions were rendered sterile and RNase free by treatment with

0.1% diethylpyrocarbonate and autoclaving.

#### Collagen Synthesis

Cells were plated at  $2 \times 10^6$  per 150 cm<sup>2</sup> flask in BME containing 10% foetal calf serum. After seven days, the cells were labelled with 5  $\mu$ Ci/ml of <sup>3</sup>H proline (Amersham, 25 Ci/m mole) in the above medium containing 50  $\mu$ g/ml ascorbic acid and 50  $\mu$ g/ml  $\beta$ -aminopropionitrile. The medium was removed and centrifuged at 10 000 x g for 5 minutes to pellet cellular debris. The supernatant was adjusted to pH 7.5 and NaCl added to a final concentration of 5 M to precipitate the collagens. After stirring at 4°C for six hours, the precipitate was pelleted at 30 000 x g for fifteen minutes at 4°C, dissolved in 10 mM Tris-HCl pH 7.5 and dialysed against the same buffer for 16 hours at 4°C to remove excess NaCl. The cells in the flasks were trypsinized and counted in a Coulter Counter, so that aliquots corresponding to the same amount of cellular material could be loaded onto polyacrylamide gels. Samples to be collagenase digested were brought to 50 mM Tris-HCl, pH 7.5, 2 mM CaCl<sub>2</sub> and 2.5 mM N-ethylmaleimide, as described by Peterkofsky and Diegelman (43). Samples to be digested with pepsin were dissolved in 200 mM Tris-HCl (pH 7.5) containing 10 mM CaCl<sub>2</sub>, and incubated at 15°C for eight hours with 100  $\mu$ g/ml pepsin. Foetal calf skin collagen was isolated as described by Piez (44). The samples were analysed on 5-11% gradient SDS-polyacrylamide gels. After staining with 0.25% Coomassie blue and destaining in 10% acetic acid, gels were soaked in 1 M salicylate for 30 minutes, dried and exposed to Du Pont Cronex 4 X-ray film.

#### DNA Isolation

Cells were grown to confluency in 150 cm<sup>2</sup> flasks in BME containing 10% foetal calf serum. Cells were scraped off into ice-cold, phosphate-buffered saline with a rubber policeman. Nuclei were prepared as previously described (45,46): briefly, the cells were suspended in RSB-buffer (10 mM Tris-HCl pH 7.5, 10 mM NaCl, 5 mM MgCl<sub>2</sub>) containing 1% Triton X-100 and homogenized with ten strokes of the tight pestle of a Dounce homogenizer. Nuclei were pelleted at 1000 x g for 5 minutes at 4°C. The pellet was resuspended in RSB-Triton and processed as above. The pellet was dissolved in double-strength SSC (SSC = 0.15 M NaCl, 0.015 M Na Citrate), SDS was added to 1% and proteinase K to 100  $\mu$ g/ml, and the mixture was then incubated at 50°C for 1 hour. Deproteinisation was effected by repeated extraction with an equal volume of phenol (saturated with 10 mM Tris-HCl pH 7.5, 1 mM EDTA), followed by two chloroform : isoamyl-alcohol (24:1) extractions. DNA was precipitated by the addition of 1/10 volume of 5 M NaCl and 2½ volumes of 96% ethanol.

After overnight precipitation at  $-20^{\circ}\text{C}$ , the DNA was wound on a pasteur pipette tip, dried under vacuum and dissolved in  $2 \times \text{SSC}$ . RNA was removed by digestion with ribonuclease A at  $100 \mu\text{g/ml}$  for 1 hour at  $37^{\circ}\text{C}$ . This was followed by phenol and chloroform extractions and ethanol precipitation as above. The DNA was dissolved in  $10 \text{ mM}$  Tris-HCl pH 7.5,  $1 \text{ mM}$  EDTA and used for restriction endonuclease digestion.

### RNA Isolation

RNA was isolated from  $50 \times 150 \text{ cm}^2$  flasks. Nuclei were removed as described above. The post-nuclear supernatant was centrifuged at  $16000 \times g$  for 15 minutes to pellet the mitochondria. The post-mitochondrial supernatant was made  $1\%$  with respect to SDS and extracted with phenol and chloroform : isoamyl-alcohol (24:1) as described above. RNA was precipitated by the addition of  $1/8$  volume of  $5 \text{ M}$  NaCl and  $2\frac{1}{2}$  volumes of absolute ethanol. After precipitation at  $-20^{\circ}\text{C}$  for 16 hours, the RNA was pelleted at  $30\ 000 \times g$  for 15 minutes, the pellet washed thrice in  $70\%$  ethanol, once in absolute ethanol, dried under vacuum and dissolved in sterile distilled water.

### Restriction Enzyme Digestion and Transfer of Nucleic Acids to Nitrocellulose Paper

DNA was digested with the various restriction enzymes as suggested by the suppliers. In the case of HpaI and MspI digestions, enzyme was added at 2 units/ $\mu\text{g}$  DNA and incubated for 3 hours at  $37^{\circ}\text{C}$ . The digested DNAs were electrophoresed for 4 hours at  $150 \text{ mA}$  on  $0.8\%$  horizontal agarose gels in  $40 \text{ mM}$  Tris-acetate pH 7.8,  $50 \text{ mM}$  Na-acetate,  $10 \text{ mM}$  EDTA. Gels were stained with  $0.1 \text{ mg/ml}$  ethidium bromide and visualized under uv light. DNA was transferred to nitrocellulose paper as described by Southern (47). RNA was dotted onto nitrocellulose paper as described (50,51): briefly the nitrocellulose paper was soaked in sterile distilled water for 5 minutes, and  $20 \times \text{SSC}$  for 30 minutes. RNA was denatured at  $65^{\circ}\text{C}$  for 5 minutes, spotted on the nitrocellulose paper, dried under a lamp and baked at  $80^{\circ}\text{C}$  for 2 hours.

### Nucleic Acid Hybridization

The filters were prehybridized for 1 hour at  $68^{\circ}\text{C}$  in  $4 \times \text{SET}$  ( $\text{SET} = 150 \text{ mM}$  NaCl,  $2 \text{ mM}$  EDTA,  $30 \text{ mM}$  Tris-HCl pH 8.0),  $10 \times \text{Denhardt}$  [Denhardt =  $0.02\%$  Ficoll 400,  $0.02\%$  polyvinylpyrrolidone,  $0.02\%$  BSA (48)],  $0.1\%$  pyrophosphate,  $0.1\%$  SDS and  $50 \mu\text{g/ml}$  E. coli DNA. Hybridization was with either  $^{32}\text{P}$ -labelled nick-translated DNA (49) or with  $^{32}\text{P}$ -labelled cDNA (45) at  $0.5 - 2 \times 10^6$  dpm/ml, in the above hybridization solution at  $68^{\circ}\text{C}$  for 20-24 hours. After hybridization, the filters were washed for 1 hour at  $68^{\circ}\text{C}$  in  $4 \times \text{SET}$ ,  $10 \times \text{Denhardt}$ ,  $0.1\%$  pyrophosphate and  $0.1\%$  SDS, followed by one wash at room

temperature in 1 x SSC and 0.5 x SSC for 1 hour each. The filters were exposed to Du Pont Cronex 4 X-ray film for 3-4 days.

#### Synthesis of Complementary DNA

cDNA was synthesized in 100  $\mu$ l reaction volumes containing 150 mM NaCl, 50 mM Tris-HCl pH 8.2, 6 mM MgCl<sub>2</sub>, 10 mM Dithiothreitol, 4  $\mu$ g/ml oligo-d(T)<sub>12-18</sub>, 1 mM each of dATP, dGTP, dTTP and 20  $\mu$ M of <sup>32</sup>P-dCTP (400 Ci/mmol), 5  $\mu$ g RNA and 75 units of AMV-reverse transcriptase. After incubation at 42°C for 2 hours, the reaction was stopped by the addition of EDTA to a final concentration of 50 mM, and passed over a Sephadex G-50 column (10 cm x 0.7 cm). <sup>32</sup>P-labelled cDNA was hybridized to southern blots of pCg45 and pCg54 as described for hybridization of genomic blots to nick translated DNA.

## RESULTS

### Collagen Synthesis in Normal and Transformed Fibroblasts

In order to quantitate the collagen produced by the two cell lines, cells were labelled with <sup>3</sup>H proline for 16 hours. An enriched collagen sample was prepared by precipitation with 5 M NaCl as described in Materials and Methods. Figure 1 shows the autoradiogram of the <sup>3</sup>H proline-labelled samples after electrophoresis on 5-11% gradient SDS-polyacrylamide gels. Two prominent bands, resistant to pepsin but sensitive to collagenase, could be seen in the case of normal fibroblasts, corresponding to  $\alpha$ 1(I) and  $\alpha$ 2 chains of type I collagen. In the samples derived from transformed fibroblasts, only one prominent band corresponding to an  $\alpha$ 1 chain was observed, with perhaps a trace of some protein in the  $\alpha$ 2 region. This major band was not  $\alpha$ 1(I), since its electrophoretic mobility was greater than that of the  $\alpha$ 1(I) chain produced by

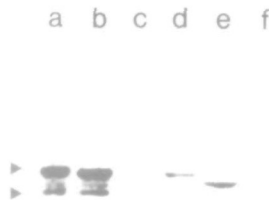

Figure 1. SDS polyacrylamide gel electrophoresis of collagens from WI-38 (lanes a - c) and from SVWI-38 (lanes d - f) fibroblasts. Cells were labelled with <sup>3</sup>H proline for 16 hours and 5 M NaCl precipitable proteins were analysed after treatment with pepsin (lanes a and d), treatment with pepsin and reduction with  $\beta$ -mercaptoethanol (lanes b and e), and digestion with collagenase (lanes c and f). Arrows indicate the position of migration of  $\alpha$ 1(I) and  $\alpha$ 2 chains.

normal fibroblasts. Analysis of the samples on SDS-urea gels (59), which separate the different  $\alpha 1$  chain from each other, confirmed these results (data not shown). The autoradiograms were scanned densitometrically and the areas under the peaks were integrated; the transformed fibroblasts produced only 25-30% of the total collagen synthesized by normal fibroblasts. These results are in agreement with those of previous reports on decreased collagen production in SV40 transformed WI-38 fibroblasts (13), but the new finding is the complete shutdown of type I collagen synthesis with the continued synthesis of a minor collagen component. Since altered post-translational modification of the collagen chains in transformed cells could not be ruled out by these experiments, characterization of the mRNAs in the different cell lines was important.

### Detection of Procollagen mRNA Sequences

The collagens are extremely conserved molecules and several studies have shown that cloned procollagen DNA sequences will cross hybridize between the same alpha chain clones of different species, but not between different alpha chain sequences within the same species, i.e. type I ( $\alpha 1$ ) chicken procollagen cDNA will hybridize to type I ( $\alpha 1$ ) mRNA or DNA from human or mouse, but not to type II or III  $\alpha$  chains of chickens. Thus Meyers et al (52) and Weiss et al (53) have shown specific hybridization of chicken  $\alpha 1(I)$  and  $\alpha 2$  procollagen cDNA clones (54,55) to human procollagen gene sequences, while others have shown specific hybridization of these chicken clones to both *Drosophila* (56,57) as well as mouse (58) procollagen gene sequences. Figure 2 shows hybridization of pCg 45 ( $\alpha 2$  clone) and pCg 54 ( $\alpha 1$  clone) to EcoRI and HindIII digested human and chicken DNAs. The patterns obtained for both human and chicken are very similar, suggesting no non-specific hybridization to non-collagen coding sequences. These results are similar to those of Myers et al (52). The chicken procollagen cDNA clones were therefore suitable for detecting human procollagen mRNA or genomic sequences.

In order to determine whether the  $\alpha 1(I)$  and  $\alpha 2$  procollagen mRNAs were present in an untranslatable form, their presence was probed for using  $^{32}\text{P}$ -labelled cDNA. Figure 3 shows the hybridization of  $^{32}\text{P}$ -labelled cDNA from both WI-38 as well as SV WI-38 cells, to either pCg 45 or pCg 54. There was complete absence of hybridizable  $\alpha 1(I)$  and  $\alpha 2$  procollagen cDNAs in the SV WI-38 fibroblasts, whereas cDNA from WI-38 fibroblasts hybridized to both pCg 45 as well as to pCg 54, indicating the presence of procollagen  $\alpha 1(I)$  and  $\alpha 2$  mRNAs in normal fibroblasts. Since the cDNA was made from total cytoplasmic RNA using oligo d(T)<sub>12-18</sub> as primer, it is possible that the  $\alpha 1(I)$

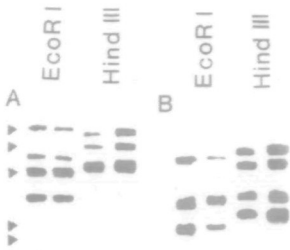

**Figure 2.** Comparison of EcoRI and HindIII restriction endonuclease patterns of human (left lane of each pair) and chicken (right lane) procollagen gene sequences. DNAs were digested with the indicated restriction endonucleases, electrophoresed on 0.8% agarose gels and hybridized to either  $^{32}\text{P}$ -nick-translated  $\alpha 1(\text{I})$  (A) or  $\alpha 2(\text{B})$  cDNA clones. Arrows indicate the position of migration of  $\lambda\text{HindIII}$  markers.

and  $\alpha 2$  procollagen mRNAs in the transformed cells were partially degraded, or that the poly (A) tails were absent. It is also possible that these mRNAs were present in such low quantities, that they were competed out by other mRNAs for the reverse transcriptase, or that they were not transported from the nucleus. In order to rule out these possibilities, total cellular RNA from WI-38 and SV WI-38 fibroblasts was immobilized onto nitrocellulose paper and hybridized to  $^{32}\text{P}$ -labelled nick-translated pCg 45 or pCg 54. Thus even if the mRNAs were partially degraded or not efficiently reverse-transcribed into cDNA, they should still have been detected by this procedure. Table I shows the results obtained after hybridization of  $^{32}\text{P}$ -labelled nick-translated clones to RNA dots of WI-38 and SV WI-38. Reticulocyte RNA was used as a control for background hybridization. These results clearly indicate the absence of  $\alpha 1(\text{I})$  and  $\alpha 2$  procollagen mRNA sequences.

#### Type I Procollagen Gene Restriction Pattern

Since no  $\alpha 1(\text{I})$  and  $\alpha 2$  procollagen mRNAs are synthesized in the transformed cells, some signal must exist for switching off these genes or some signal to "turn on" the genes is now absent. In order to determine whether large regions of the  $\alpha 1(\text{I})$  and  $\alpha 2$  procollagen genes were deleted, WI-38 and SV WI-38 fibroblast DNAs were digested with EcoRI, HindIII, KpnI, and HaeIII. Figure

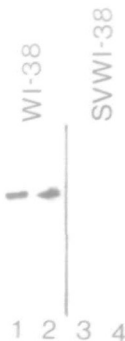

**Figure 3.** Detection of procollagen mRNA sequences in WI-38 and SVWI-38 fibroblasts.  $^{32}\text{P}$ -labelled cDNA to WI-38 (lanes 1 and 2) and SVWI-38 (lanes 3 and 4) were hybridized to pCg 54 ( $\alpha 1(\text{I})$ ) and pCg 45 ( $\alpha 2$ ) procollagen cDNA clones immobilized onto nitrocellulose paper. Lanes 1 and 3 indicate hybridization to pCg 54 and 2 and 4 to pCg 45.

Table 1. Detection of type I procollagen sequences in WI-38 and SVWI-38 fibroblasts. Total RNA was immobilized onto nitrocellulose paper as described in Materials and Methods, and hybridized to nick translated  $\alpha 1(I)$  and  $\alpha 2$  procollagen cDNA clones.

| Probe         | $\mu\text{g}$ RNA Immobilized | DPM $^{32}\text{P}$ Probe Hybridized |       |         |
|---------------|-------------------------------|--------------------------------------|-------|---------|
|               |                               | Reticulocyte                         | WI-38 | SVWI-38 |
| $\alpha 1(I)$ | 0.1                           | ----                                 | 188   | 15      |
|               | 1.0                           | ----                                 | 760   | 21      |
|               | 10.0                          | 23                                   | 4020  | 44      |
|               | 20.0                          | 34                                   | 6500  | 89      |
| $\alpha 2$    | 0.1                           | ----                                 | 150   | 25      |
|               | 1.0                           | ----                                 | 890   | 18      |
|               | 10.0                          | 36                                   | 2700  | 50      |
|               | 20.0                          | 47                                   | 4410  | 90      |

4a and 4b show that the restriction patterns for both WI-38 and SV WI-38 were identical when restricted with the enzymes EcoR1, HindIII, KpnI, and HaeIII, which do not have CpG dinucleotides in their recognition sequences and therefore would not be sensitive to CpG methylation. This applies both to the  $\alpha 1(I)$  as well as the  $\alpha 2$  genes. However, HpaII and MspI digests showed striking differences in the restriction pattern of both  $\alpha 1(I)$  and  $\alpha 2$  genes (Figure 5). In the  $\alpha 1(I)$  gene of WI-38 fibroblasts, there were five HpaII fragments ranging in size from 0.3 to 1.8 kb. MspI digestion showed that very few methylated sites were present in the  $\alpha 1(I)$  gene. The same applied to the  $\alpha 2$  gene, with low molecular weight fragments ranging in size from 0.6-2.5 kb. However, in the transformed cells, these low molecular weight bands were absent in both HpaII and MspI digested samples. These results indicate extensive hypermethylation of the procollagen  $\alpha 1(I)$  and  $\alpha 2$  genes. The finding that MspI fails to generate the 0.4-2.5 kb fragments can be explained by the fact that the enzyme, although insensitive to methylation of the internal cytosine and able to cleave at  $\text{C}^m\text{CGG}$ , fails to cut at  $^m\text{CCGG}$  or at  $^m\text{C}^m\text{CGG}$ . The only explanation therefore is that the latter two methylated states were also present. In order to monitor the completeness of digestion,  $\lambda\text{DNA}$  was added to WI-38 or SV WI-38 in parallel incubations. In these incubations the  $\lambda\text{DNA}$  was completely digested, indicating the absence of an inhibitor of



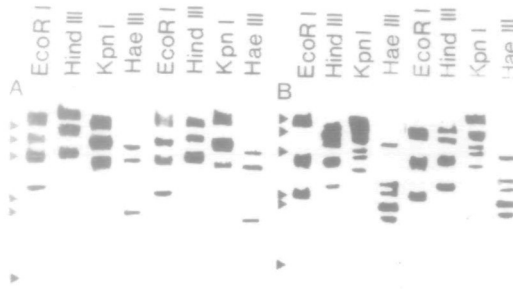

Figure 4. Restriction endonuclease digestion patterns of WI-38 (left 4 of each set) and SVWI-38 (right 4 of each set) procollagen gene sequences. DNAs were digested with the indicated restriction endonucleases and hybridized to either nick-translated pCg 54 (A) or pCg 45 (B) procollagen clones. Arrows indicate the position of migration of  $\lambda$ HindIII markers.

the restriction enzymes or impure preparations of DNA. It is therefore clear that there were no large deletions in the  $\alpha 1(I)$  and  $\alpha 2$  procollagen genes in the transformed fibroblasts, but that they may, in fact, be extensively methylated.

DISCUSSION

Previous experiments have shown that transformation of mouse embryo fibroblasts with mouse sarcoma virus results in altered collagen gene expression, in that the overall collagen synthesis is decreased to about 10% of the normal (10,14,15). There is also the activation of another minor collagen component

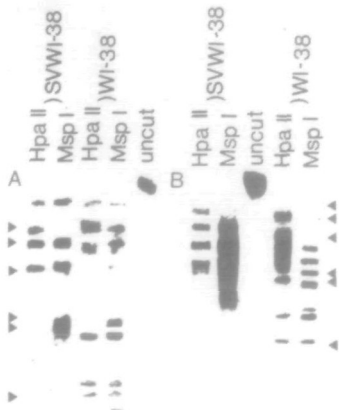

Figure 5. Detection of methylated sites within the procollagen genes of normal (WI-38) and SV40-transformed (SVWI-38) fibroblasts. DNAs were digested with either HpaII or MspI and hybridized to pCg 54 (A) or pCg 45 (B). Arrows indicate the position of  $\lambda$ HindIII markers.

(10,14,61). We have now shown that human diploid fibroblasts transformed with the DNA tumour virus (SV40) cease the synthesis of type I collagen. The mechanism by which this altered procollagen gene expression is achieved would not appear to be due to random activation or inactivation of stretches of DNA upon transformation. A similar activation of normally non-expressed genes upon transformation was described by Groudine and Weintraub (60), who found that transformation of chicken embryo fibroblasts with Rous Sarcoma virus results in the expression of embryonic but not adult globin genes. However, using the mouse sarcoma virus transformed mouse embryo fibroblasts, Parker and Fitschen (46) have shown that no globin genes are activated, although procollagen gene transcription is greatly reduced while a minor species of collagen which behaves similarly to type III  $\alpha$  chains on carboxymethylcellulose is activated (61).

Exactly how this specific activation and depression of certain genes occurs is still uncertain. The only obvious difference between the pro  $\alpha 1(I)$  and pro  $\alpha 2$  genes in the normal and SV40 transformed fibroblasts is the hypermethylation of these genes upon transformation. Similar results have been obtained in avian erythroblastosis virus-transformed cells (31). Normal chicken erythroblasts produce the adult  $\beta$ ,  $\alpha^A$  and  $\alpha^D$  globins, but upon transformation with AEV,  $\beta$  and  $\alpha^D$  globin gene transcription is shut off, whereas  $\alpha^A$  genes continue to be transcribed. Further studies have shown that the inactivated  $\beta$  and  $\alpha^D$  globin genes are hypermethylated whilst the  $\alpha^A$  genes are unaffected by transformation. It is interesting that such similar findings of hypermethylation with inactivation of these two different genes in different systems should exist. It is therefore possible that hypermethylation may be a universal phenomenon associated with altered gene expression upon viral transformation, especially in view of the fact that AEV is a RNA tumour virus whilst SV40 is a DNA tumour virus. It would be interesting to see whether all DNA tumour viruses or all RNA tumour viruses affect the same genes, and in the same manner.

That the SV40 genome is not integrated with the  $\alpha 1(I)$  and  $\alpha 2$  procollagen genes or that transformation does not result in gross alterations in procollagen gene structure is demonstrated by the fact that the EcoRI, HindIII, KpnI, and HaeIII restriction patterns are identical in both cell lines. It is also unlikely that viral transformation of WI-38 fibroblasts results in gross hypermethylation of genomic DNA since both WI-38 and SV WI-38 fibroblasts have the same 5-methylcytosine content as determined by high pressure liquid chromatography (42).

Several lines of evidence indicate that methylation of cytosines plays a role in gene expression at the transcriptional level (26-41). Additional evidence comes from the use of inhibitors of DNA methylation (64,65). Treatment of appropriate cells with such inhibitors (e.g. 5-azacytidine) causes the activation of normally dormant retrovirus genes (51,62,63). The normally inactive ev-1 retrovirus locus in chicken cells are hypermethylated and insensitive to DNase-1. On treatment with 5-azacytidine, the ev-1 locus is sensitized to DNase-1, becomes hypomethylated, and is expressed (51).

Methylation could be involved in the regulation of gene expression via interaction of the DNA with specific proteins. Examples of these could be the high mobility group proteins (HMG 14 and HMG 17), or the DNA binding proteins which appear to be synthesized in larger quantities in SV WI-38 cells than in WI-38 cells (66). It is obvious that the chromosomal proteins play a very important role in the regulation of gene expression (for review see Ref. 67), but these proteins would require some signal from the DNA in order to recognise genes or families of genes, and DNA methylation could be one such signal.

#### ACKNOWLEDGEMENTS

We are grateful to Dr J.W. Beard and Dr Helga Boedtker for the gifts of AMV reverse transcriptase and chicken procollagen clones, respectively. M.I.P. wishes to thank the University of Cape Town for the U.C.T. Cancer Fellowship. This work was supported by grants from the National Cancer Association.

\*To whom correspondence should be addressed.

#### REFERENCES

1. Temin, H.M. (1956) *J. Natl. Cancer Inst.* 35, 679-693.
2. Ishimoto, N., Temin, H.M. and Strominger, J.L. (1966) *J. Biol. Chem.* 241, 2052-2057.
3. Saito, H. and Uzman, B.G. (1971) *Biochem. Res. Commun.* 43, 723-728.
4. Roblin, R., Albert, S.O., Gelb, N.A., Black, P.H. (1975) *Biochemistry* 14, 347-357.
5. Klagsburg, M. (1976) *Biochim. Biophys. Acta* 451, 170-183.
6. Hynes, R.O. (1976) *Biochim. Biophys. Acta* 458, 73-107.
7. Green, H., Goldberg, B. and Todaro, G. (1966) *Nature* 212, 631-633.
8. Peterkofsky, B. and Prather, W.B. (1974) *Cell* 3, 291-299.
9. Levinson, W., Bhatnagar, R.S., Lui, T. (1975) *J. Natl. Cancer Inst.* 55, 807-810.
10. Hata, R. and Peterkofsky, B. (1977) *Proc. Natl. Acad. Sci.* 74, 2933-2937.
11. Arbogast, B.W., Yoshimura, M., Kefalides, N.A., Holtzer, H. and Kaji, A. (1977) *J. Biol. Chem.* 252, 8863-8868.
12. Kamine, J. and Rubin, H. (1977) *J. Cellular Physiol.* 92, 1-12.

13. Krieg, T., Aumailley, M., Dessau, W., Wiestner, M. and Muller, P.K. (1980) *Exptl. Cell Res.* 125, 23-30.
14. Bateman, J.F. and Peterkofsky, B. (1981) *Proc. Natl. Acad. Sci.* 78, 6028-6032.
15. Parker, I. and Fitschen, W. (1980) *Nucleic Acids Res.* 13, 2823-2833.
16. Rowe, D.W., Moen, R.C., Davidson, J.M., Beyers, P.H., Bornstein, P. and Palmiter, R. (1978) *Biochemistry* 17, 1581-1590.
17. Adams, S.L., Sobel, M.E., Howard, B.H., Olden, K., Yamada, K.M., de Crombrugge, B. and Pastan, I. (1977) *Proc. Natl. Acad. Sci.* 74, 3399-3403.
18. Parry, G., Soo, W. and Bissel, M.J. (1979) *J. Biol. Chem.* 254, 11763-11766.
19. Sandmeyer, S., Smith, R., Kihn, D. and Bornstein, P. (1981) *Cancer Res.* 41, 830-838.
20. Howard, B.H., Adams, S.L., Sobel, M.E., Pastan, I. and de Crombrugge, B. (1978) *J. Biol. Chem.* 253, 5869-5874.
21. Adams, S.L., Alwine, J.C., de Crombrugge, B. and Pastan, I. (1979) *J. Biol. Chem.* 254, 4935-4938.
22. Smith, B.D. and Niles, R. (1980) *Biochemistry* 19, 1820-1825.
23. Gay, S., Martin, E.R., Muller, P.K., Timpl, R. and Kuhn, K. (1976) *Proc. Natl. Acad. Sci.* 73, 4037-4040.
24. Hance, A.J. and Crystal, R.G. (1977) *Nature* 268, 152-154.
25. Goldberg, B. (1977) *Cell* 11, 169-172.
26. Weintraub, H., Larsen, A. and Groudine, M. (1981) *Cell* 24, 333-344.
27. van der Ploeg, L.H.T., Groffen, J. and Flavell, R.A. (1980) *Nucleic Acids Res.* 8, 4563-4574.
28. McGhee, J.D. and Ginder, G.D. (1979) *Nature* 280, 419-420.
29. Shen, C.J. and Maniatis, T. (1980) *Proc. Natl. Acad. Sci.* 77, 6634-6638.
30. Waalwijk, C. and Flavell, R.A. (1978) *Nucleic Acids Res.* 5, 4631-4641.
31. Marcaud, L., Reynaud, C., Therwath, A. and Scherrer, C. (1981) *Nucleic Acids Res.* 9, 1841-1851.
32. Kuo, M.T., Mandel, J.L. and Chambon, P. (1979) *Nucleic Acids Res.* 7, 2105-2113.
33. Mandel, J.L. and Chambon, P. (1979) *Nucleic Acids Res.* 7, 2081-2103.
34. Rogers, J. and Wall, W. (1981) *Proc. Natl. Acad. Sci.* 78, 7497-7501.
35. Dackowski, W. and Morrison, S.L. (1981) *Proc. Natl. Acad. Sci.* 78, 7091-7095.
36. Yagi, M. and Koshland, M.E. (1981) *Proc. Natl. Acad. Sci.* 78, 4907-4911.
37. Compere, S.J. and Palmiter, R.D. (1981) *Cell* 25, 233-240.
38. Jones, R.E., De Feo, D. and Piatigorski, J. (1981) *J. Biol. Chem.* 256, 8172-8175.
39. Razin, A. and Riggs, A.D. (1980) *Science* 210, 604-610.
40. van der Ploeg, L.H.T. and Flavell, R.A. (1980) *Cell* 19, 947-958.
41. Cedar, H., Solage, A., Glaser, G. and Razin, A. (1979) *Nucleic Acids Res.* 6, 2125-2132.
42. Diala, E.S., Plent, M.M., Coalson, D.W. and Hoffman, R.M. (1981) *Biochem. Biophys. Res. Commun.* 102, 1379-1384.
43. Peterkofsky, B. and Diegelman, R. (1971) *Biochemistry* 10, 988-994.
44. Piez, K.A. (1967) In *Treatise on Collagen* (Ed. Ramachandran, G.N.) Vol. 1, pp. 207-252. Academic Press (N.Y.).
45. Parker, I. and Fitschen, W. (1980) *Cell Differentiation* 9, 13-30.
46. Parker, I. and Fitschen, W. (1979) *Experientia* 35, 1312-1313.
47. Southern, E.M. (1975) *J. Mol. Biol.* 98, 503-517.
48. Denhardt, D. (1966) *Biochem. Biophys. Res. Commun.* 23, 641-652.
49. Maniatis, T., Jeffrey, A. and Kleid, D.G. (1975) *Proc. Natl. Acad. Sci.* 72, 1184-1188.
50. Thomas, P.S. (1980) *Proc. Natl. Acad. Sci.* 77, 5201-5205.
51. Groudine, M., Eisenman, R. and Weintraub, H. (1981) *Nature* 292, 311-317.

52. Myers, J.C., Chu, M.L., Faro, S.H., Clark, W., Prockop, D.J. and Ramirez, F. (1981) *Proc. Natl. Acad. Sci.* 78, 3516-3520.
53. Weiss, E.H., Cheah, K.S.E., Grosveld, F.G., Dahl, H.H.M., Solomon, E. and Flavell, R.A. (1982) *Nucleic Acids Res.* 10, 1981-1994.
54. Lehrach, H., Frischauf, A.M., Hanahan, D., Wozney, J., Fuller, R., Crkvenjakov, R., Boedtke, H. and Doty, P. (1978) *Proc. Natl. Acad. Sci.* 75, 5417-5321.
55. Lehrach, H., Frischauf, A.M., Hanahan, D., Wozney, J., Fuller, F. and Boedtke, H. (1979) *Biochemistry* 18, 3146-3152.
56. Natzle, J.E., Monson, J.M. and McCarthy, B.J. (1982) *Nature* 296, 368-371.
57. Monson, J.M. and McCarthy, B.J. (1981) *DNA* 1, 59-69.
58. Monson, J.M., Natzle, J., Friedman, J., McCarthy, B.J. (1982) *Proc. Natl. Acad. Sci.* 79, 1761-1765.
59. Hayashi, T. and Nagai, Y. (1979) *J. Biochem.* 86, 453-459.
60. Groudine, M. and Weintraub, H. (1975) *Proc. Natl. Acad. Sci.* 72, 4464-4468.
61. Parker, I. (1979) Ph.D. Thesis, University of Cape Town.
62. Niwa, O. and Sugahaia, T. (1981) *Proc. Natl. Acad. Sci.* 78, 6290-6294.
63. Harbers, K., Schnieke, A., Stuhlmann, H., Jahner, D. and Jaenisch, R. (1981) *Proc. Natl. Acad. Sci.* 78, 7609-7613.
64. Taylor, S.M. and Jones, P.A. (1979) *Cell* 17, 771-779.
65. Constantinides, P.G., Jones, P.A. and Gevers, W. (1977) *Nature* 267, 364-366.
66. Stein, G.H. (1976) *Exptl. Cell Res.* 99, 115-125.
67. Stein, G.S., Stein, J.L. and Thomson, J.A. (1978) *Cancer Res.* 38, 1181-1201.
